# Supplementary material for: SNP Array Screening and Long Range PCR-Based Targeted Next Generation Sequencing for Autosomal Recessive Disease with Consanguinity: Insight from a Case of Xeroderma Pigmentosum Group C
Source: MDPI journal article supplement (doi:10.3390/genes14112079), 2023-11-15
Supplement: s1 [file s1]

**Supplemental Table S1.** Primer sequences of long-range PCR and XPC mutation specific site.

| Primer set   | Primer Name | Primer sequence                   | Primer position (GRCh38.p14) | Product size (bp) |
|--------------|-------------|-----------------------------------|------------------------------|-------------------|
| ERCC4-A Long | ERCC4_L_A-F | 5'-TATCTGCCTCAGAGGAAACGCTGTATG-3' | 13918667_13918693            | 18200             |
|              | ERCC4_L_A-R | 5'-GAGCTGAATTAAGCACCTCCTCTGTCC-3' | 13936866_13936840            |                   |
| ERCC4-B Long | ERCC4_L_B-F | 5'-CAGCTTGAAATTTACAGGGCGAGTAGG-3' | 13935700_13935726            | 19318             |
|              | ERCC4_L_B-R | 5'-CTCGATGGCGTGGACTGTTTGTATAG-3'  | 13955017_13954991            |                   |
| XPC-A Long   | XPC_L_A-F   | 5'-ACCCTCAAGGAGCTCATTCTACTGTGG-3' | 14179936_14179910            | 19155             |
|              | XPC_L_A-R   | 5'-GTTTCTTCTTGTACAGCATGGCACAGG-3' | 14160782_14160808            |                   |
| XPC-B Long   | XPC_L_B-F   | 5'-CCAGCCTCTCAATICTATGCTGTTGG-3'  | 14162464_14162439            | 18453             |
|              | XPC_L_B-R   | 5'-AGACCTGAGTTCTGAGCCAAAGATTGC-3' | 14144012_14144038            |                   |
| XPC Exon 2   | XPC_Ex2-F   | 5'-GTTTGGAGACAGGTCATAGAGC-3'      | 14173165_14173144            | 412               |
|              | XPC_Ex2-R   | 5'-GATCCAATCTTCCATGGACCC-3'       | 14172756_14172776            |                   |

**Supplemental Table S2.** Detected variants in *XPC* and *ERCC4*.

| Gene         | Chromosome | POS (hg38) | dbSNP_ID    | REF | ALT | HGVS_format*                          | GT  | AD    | DP  | MAF    |
|--------------|------------|------------|-------------|-----|-----|---------------------------------------|-----|-------|-----|--------|
| <i>XPC</i>   | chr3       | 14145845   | rs2229090   | G   | C   | c.*96C>G                              | 1/1 | 1,303 | 304 | 0.3733 |
|              |            | 14145949   | rs2228001   | G   | T   | c.2815C>A p.(Gln939Lys)               | 1/1 | 0,397 | 397 | 0.5810 |
|              |            | 14146199   | rs2733532   | T   | C   | c.2605-40A>G                          | 1/1 | 0,306 | 306 | 0.5905 |
|              |            | 14147647   | rs2257984   | A   | G   | c.2514+261T>C                         | 1/1 | 2,289 | 291 | 0.5815 |
|              |            | 14148737   | rs2279017   | T   | G   | c.2251-6A>C                           | 1/1 | 0,138 | 138 | 0.5800 |
|              |            | 14149147   | rs542883216 | A   | G   | c.2116-199T>C                         | 1/1 | 0,246 | 246 | 0.0382 |
|              |            | 14150149   | rs76357945  | G   | A   | c.2116-1201C>T                        | 1/1 | 0,259 | 259 | 0.3324 |
|              |            | 14151004   | rs2607734   | A   | G   | c.2115+1331T>C                        | 1/1 | 0,257 | 257 | 0.5808 |
|              |            | 14151433   | rs2607736   | A   | G   | c.2115+902T>C                         | 1/1 | 0,248 | 248 | 0.5531 |
|              |            | 14154514   | rs34574722  | G   | GC  | c.2033+1820dupG                       | 1/1 | 0,284 | 284 | 0.5531 |
|              |            | 14156487   | rs2958057   | A   | T   | c.1881T>A p.(Ala627=)                 | 1/1 | 0,236 | 236 | 1.0000 |
|              |            | 14158387   | rs2228000   | G   | A   | c.1496C>T p.(Ala499Val)               | 1/1 | 0,331 | 331 | 0.3322 |
|              |            | 14163943   | rs2061316   | C   | G   | c.900+870G>C                          | 1/1 | 0,184 | 184 | 1.0000 |
|              |            | 14166208   | rs1106087   | C   | A   | c.622-623G>T                          | 1/1 | 1,175 | 176 | 0.3302 |
|              |            | 14169601   | rs2733537   | A   | G   | c.412+837T>C                          | 1/1 | 0,141 | 141 | 0.3559 |
|              |            | 14172947   | NR          | C   | CA  | c.218_219insT<br>p.(Lys73fsAsnfsTer9) | 1/1 | 0,205 | 205 | NR     |
| <i>ERCC4</i> | chr16      | 13937663   | rs31869     | G   | A   | c.1812-103G>A                         | 1/1 | 0,182 | 182 | 0.9825 |
|              |            | 13945011   | rs141025391 | T   | G   | c.2017+176T>G                         | 1/1 | 0,171 | 171 | 0.0224 |

\* Reference sequences are NM\_004628.5 for *XPC* and NM\_005236.3 for *ERCC4*. AD; allele depth, ALT; variant bases, DP; depth, GT; genotype (1/1 means homozygous), MAF; minor allele frequency in Japanese women by Japanese multi omics reference panel (<https://jmorp.megabank.tohoku.ac.jp/>, last accessed 20 October 2023), NR; not reported, REF; reference base.
